# Supplementary material for: Paxillin phosphorylation at serine 273 and its effects on Rac, Rho and adhesion dynamics
Source: PubMed Central journal article supplement (PMC6053249; doi:10.1371/journal.pcbi.1006303), 2018-07-05
Supplement: pcbi.1006303.s006.pdf [file pcbi.1006303.s006.pdf]

| Description of the Reaction               | Reaction Schemes                                                                                                  | Reaction Number |
|-------------------------------------------|-------------------------------------------------------------------------------------------------------------------|-----------------|
| Rac/Rho activation and inactivation       | $RhoGDP \xrightleftharpoons[RhoGAP]{RhoGEF} RhoGTP$                                                               | 1               |
|                                           | $RacGDP \xrightleftharpoons[RacGAP]{RacGEF} RacGTP$                                                               | 2               |
| PAK activation and inactivation           | $RacGTP + PAK \xrightleftharpoons{} PAK-RacGTP$                                                                   | 3               |
| Paxillin phosphorylation                  | $Pax \xrightleftharpoons[PP2A]{PAK-RacGTP} Pax_p$ $Pax \xrightleftharpoons[PP2A]{Pax_p-GIT-PIX-PAK-RacGTP} Pax_p$ | 4               |
| Assembly of the GIT-PIX-PAK complex       | $GIT + PIX \xrightleftharpoons{} GIT-PIX$                                                                         | 5               |
|                                           | $GIT-PIX + PAK \xrightleftharpoons{} GIT-PIX-PAK$                                                                 | 6               |
|                                           | $PIX + PAK \xrightleftharpoons{} PIX-PAK$                                                                         | 7               |
|                                           | $GIT + PIX-PAK \xrightleftharpoons{} GIT-PIX-PAK$                                                                 | 8               |
| Formation of the PIX-PAK-RacGTP complex   | $PIX-PAK + RacGTP \xrightleftharpoons{} PIX-PAK-RacGTP$                                                           | 9               |
|                                           | $PIX + PAK-RacGTP \xrightleftharpoons{} PIX-PAK-RacGTP$                                                           | 10              |
| Paxillin-GIT-PIX-PAK binding              | $Pax_p + GIT-PIX-PAK \xrightleftharpoons{} Pax_p-GIT-PIX-PAK$                                                     | 11              |
| Activation of Pax <sub>p</sub> -bound PAK | $Pax_p-GIT-PIX-PAK + RacGTP \xrightleftharpoons{} Pax_p-GIT-PIX-PAK-RacGTP$                                       | 12              |
