# Supplementary material for: Paxillin phosphorylation at serine 273 and its effects on Rac, Rho and adhesion dynamics
Source: PubMed Central journal article supplement (PMC6053249; doi:10.1371/journal.pcbi.1006303), 2018-07-05
Supplement: pcbi.1006303.s007.pdf [file pcbi.1006303.s007.pdf]

|                                                    |      |       |      |      |      |      |      |     |
|----------------------------------------------------|------|-------|------|------|------|------|------|-----|
| <b>Carbachol Dosage (<math>\mu\text{M}</math>)</b> | 0    | 0.001 | 0.01 | 0.1  | 0.3  | 1    | 10   | 100 |
| <b>Percentage Active FAK</b>                       | 23.6 | 20.3  | 22.7 | 56.6 | 72.0 | 71.3 | 86.6 | 100 |
